# Supplementary material for: Marginal Adaptation and Porosity of Calcium Silicate Cements in Furcation Perforations: A Micro-CT Comparative Study
Source: Research Square preprint supplement (doi:10.21203/rs.3.rs-6315576/v1), 2025-04-17
Supplement: Supplementary file 1 [file 044115366ab19fde65ee5681.docx]

**PRILE 2021 Flowchart**

***From: Nagendrababu V, Murray PE, Ordinola-Zapata R, Peters OA, Rôças IN, Siqueira JF Jr, Priya E, Jayaraman J, Pulikkotil SJ, Camilleri J, Boutsioukis C, Rossi-Fedele G, Dummer PMH (2021) PRILE 2021 guidelines for reporting laboratory studies in Endodontology: a consensus-based development. *International Endodontic Journal* May 3. doi: 10.1111/iej.13542.** [**https://onlinelibrary.wiley.com/doi/abs/10.1111/iej.13542**](https://onlinelibrary.wiley.com/doi/abs/10.1111/iej.13542)**.**

**For further details visit: http://pride-endodonticguidelines.org/prile**
